# Supplementary material for: Fructose and methylglyoxal-induced glycation alters structural and functional properties of salivary proteins, albumin and lysozyme
Source: PubMed Central journal article supplement (PMC8782344; doi:10.1371/journal.pone.0262369), 2022-01-21

The row image of S5A Fig.

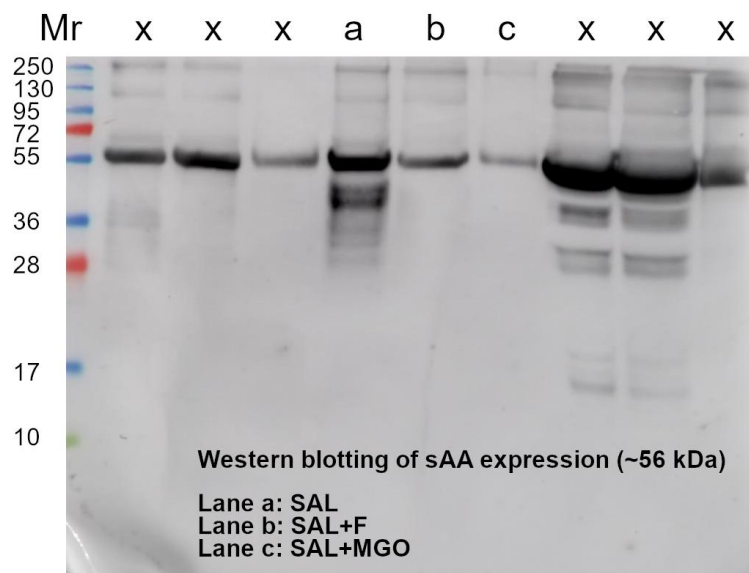

Supplement: pone.0262369.s010.pdf [file pone.0262369.s010.pdf]
